# Supplementary material for: Theoretical tools to distinguish O-ylides from O-ylidic complexes in carbene–solvent interactions
Source: Royal Society of Chemistry journal article supplement (doi:10.1039/c5cp04783h), 2015-01-01
Supplement: c5cp04783h1.pdf [file c5cp04783h1.pdf]

## Supplementary Material

# Theoretical Tools to Distinguish *O*-Ylides from *O*-Ylidic Complexes in Carbene-Solvent Interactions

Sara Gómez\*, Albeiro Restrepo, and C. Z. Hadad\*

This document contains appendices A0, A1, A2, A3, and A4 that supplement arguments and results of the article.

## 1 Appendix A0

Natural bond orders for Cc···O interactions in the title clusters

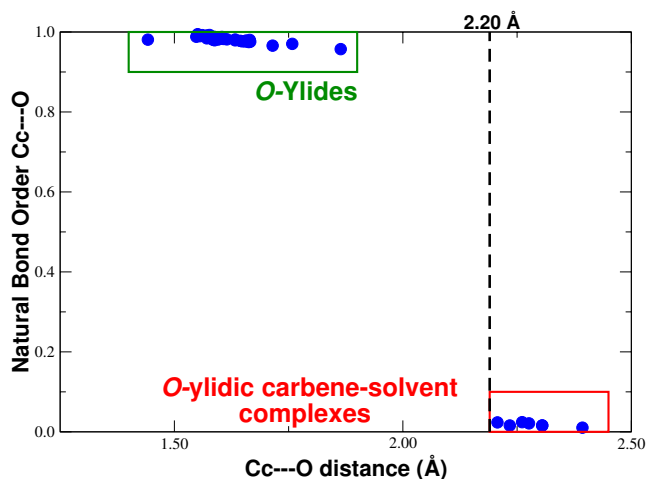

Figure 1: Natural bond orders vs. distances for carbene carbon···oxygen interaction in all FCH···(MeOH)<sub>3</sub> equilibrium structures. Bond lengths in Å.

Table 1: Natural Bond Order from Natural Resonance Theory (NRT), Wiberg bond indexes (WBI) and WBI relative values between carbene carbon and the methanol oxygen for *O*-ylides and complexes.

| Structure            | Cc···O<br>Natural Bond Order | Cc···O<br>WBI | Relative<br>WBI |
|----------------------|------------------------------|---------------|-----------------|
| <b>1</b> , $y_1$     | 0.99                         | 0.63          | 0.98            |
| <b>2</b> , $y_2$     | 0.99                         | 0.63          | 0.98            |
| <b>3</b> , $y_3$     | 0.98                         | 0.57          | 0.89            |
| <b>4</b> , $y_4$     | 0.99                         | 0.62          | 0.97            |
| <b>5</b> , $y_5$     | 0.99                         | 0.59          | 0.92            |
| <b>6</b> , $y_6$     | 0.99                         | 0.62          | 0.97            |
| <b>7</b> , $y_7$     | 0.99                         | 0.58          | 0.91            |
| <b>8</b> , $y_8$     | 0.98                         | 0.54          | 0.84            |
| <b>9</b> , $y_9$     | 0.99                         | 0.60          | 0.94            |
| <b>10</b> , $y_{10}$ | 0.98                         | 0.53          | 0.83            |
| <b>11</b> , $y_{11}$ | 0.98                         | 0.52          | 0.81            |
| <b>12</b> , $y_{12}$ | 0.99                         | 0.64          | 1.00            |
| <b>13</b> , $y_{13}$ | 0.98                         | 0.61          | 0.95            |
| <b>14</b> , $y_{14}$ | 0.98                         | 0.60          | 0.94            |
| <b>15</b> , $y_{15}$ | 0.99                         | 0.58          | 0.91            |
| <b>16</b> , $y_{16}$ | 0.99                         | 0.57          | 0.89            |
| <b>17</b> , $y_{17}$ | 0.98                         | 0.51          | 0.80            |
| <b>18</b> , $y_{18}$ | 0.98                         | 0.58          | 0.91            |
| <b>19</b> , $y_{19}$ | 0.98                         | 0.59          | 0.92            |
| <b>20</b> , $y_{20}$ | 0.98                         | 0.59          | 0.92            |
| <b>21</b> , $y_{21}$ | 0.99                         | 0.59          | 0.92            |
| <b>22</b> , $y_{22}$ | 0.98                         | 0.57          | 0.89            |
| <b>23</b> , $y_{23}$ | 0.98                         | 0.60          | 0.94            |
| <b>24</b> , $y_{24}$ | 0.97                         | 0.47          | 0.73            |
| <b>25</b> , $y_{25}$ | 0.99                         | 0.56          | 0.88            |
| <b>26</b> , $y_{26}$ | 0.99                         | 0.59          | 0.92            |
| <b>27</b> , $y_{27}$ | 0.98                         | 0.54          | 0.84            |
| <b>31</b> , $y_{28}$ | 0.98                         | 0.51          | 0.80            |
| <b>33</b> , $y_{29}$ | 0.98                         | 0.51          | 0.80            |
| <b>34</b> , $y_{30}$ | 0.98                         | 0.56          | 0.88            |
| <b>35</b> , $y_{31}$ | 0.97                         | 0.51          | 0.80            |
| <b>36</b> , $y_{32}$ | 0.98                         | 0.51          | 0.80            |
| <b>38</b> , $y_{33}$ | 0.98                         | 0.54          | 0.84            |
| <b>41</b> , $y_{34}$ | 0.96                         | 0.31          | 0.48            |
| <b>43</b> , $y_{35}$ | 0.98                         | 0.48          | 0.75            |
| <b>44</b> , $y_{36}$ | 0.97                         | 0.40          | 0.63            |
| <b>28</b> , $c_1$    | 0.02                         | 0.09          | 0.14            |
| <b>29</b> , $c_2$    | 0.02                         | 0.09          | 0.14            |
| <b>30</b> , $c_3$    | -                            | -             | -               |
| <b>32</b> , $c_4$    | 0.02                         | 0.11          | 0.17            |
| <b>37</b> , $c_5$    | 0.01                         | 0.07          | 0.11            |
| <b>39</b> , $c_6$    | 0.02 2                       | 0.12          | 0.19            |
| <b>40</b> , $c_7$    | 0.02                         | 0.10          | 0.16            |
| <b>42</b> , $c_8$    | 0.02                         | 0.10          | 0.16            |

## 2 Appendix A1

### Laplacians of electron densities at BCPs for the $Cc \cdots O$ interactions

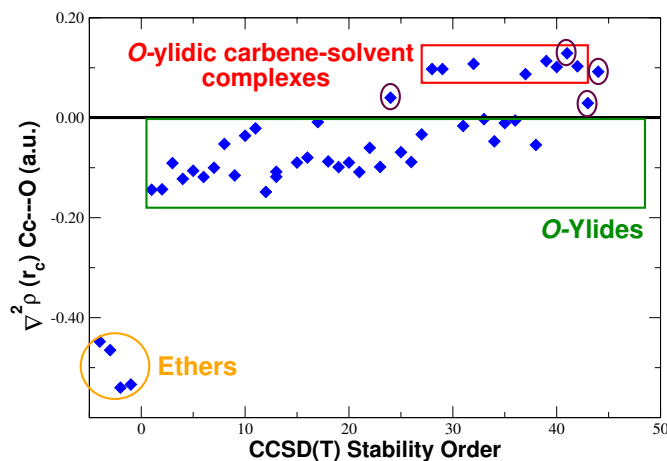

Figure 2: Relationship between the Laplacian of the electron density at carbene carbon-oxygen BCPs and the stability order at CCSD(T) level of theory. Maroon ellipses enclose structures at the borderline between *O*-ylides and *O*-ylidic complexes.

**Limit cases:** In general, it is difficult to discern if the clusters located at the border of the groups belong to one or other group. However, we were able to distinguish them as ylides, by employing natural charges and orbitals, by comparing with the literature reported  $Cc-O$  distances, and by analyzing their  $Cc-O$  bond orders. They have been differentiated in all figures by means of ellipses. A summary of the main features for such clusters is offered below.

- **24**,  $y_{24}$ : Within limit cases, this is the most stable fluoro-carbene-(methanol)<sub>3</sub> cluster, with a binding energy about 18 kcal/mol. Via NBO analysis, we found that in this aggregate, the  $C \cdots O$  interaction leads to a  $\sigma_{Cc-O}$  bonding orbital (see the structure at the top panel in Figure 3); so,

carbene and methanol (that includes O11) constitute a single unit. This situation is also present (but not shown in the figures of this Appendix) for the  $y_{34}$ ,  $y_{35}$  and  $y_{36}$  structures.

There is a strong donor  $\rightarrow$  acceptor interaction ( $E^{(2)} = 29.40$  kcal/mol) which is the result of the interaction between a lone pair of the Fluorine atom in fluorocarbene and the O11–Cc (O11 is the methanol oxygen) antibonding orbital. We denote this interaction as  $n_F^{(3)} \rightarrow \sigma_{O11-Cc}^*$  as depicted in middle panel of Figure 3. The interaction between the lone pair of carbene carbon and the O–H antibonding orbital, i.e.  $n_{Cc}^{(1)} \rightarrow \sigma_{O5-H6}^*$  (bottom left panel in Figure 3), represents the fact that the hydrogen belonging to O–H is electron acceptor of the  $\sigma$  carbene carbon occupied orbital. It has the largest stabilizing interaction energy among the intermolecular interaction in the cluster: 41.12 kcal/mol. Values for hydrogen bonds among methanol molecules are 35.38 and 3.13 kcal/mol for this aggregate (see the bottom right panel of the Figure 3).

Other useful descriptors indicating that this cluster has *O*-ylide nature are the signs of  $\Delta q$  on carbene carbon and on oxygen atom:  $\Delta q(Cc) < 0$  and  $\Delta q(O) > 0$ , which can be represented as **(FHC<sup>−</sup>—O<sup>+</sup>HCH<sub>3</sub>) ··· (2CH<sub>3</sub>OH)**. The WBI for the Cc–O bond in this structure is 0.47 and such value is very close to WBIs for other ylides (see Figure 5 in the paper). Its Cc–O distance is 1.72 Å.

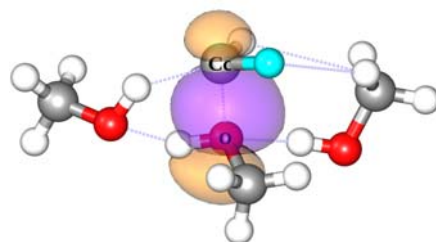

$$\sigma_{Cc-O}$$

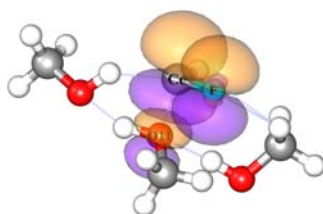

$$n_F^{(3)} \longrightarrow \sigma_{O11-Cc}^* = 29.40$$

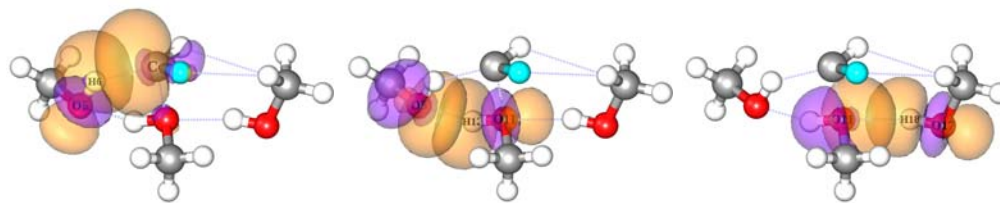

$$n_{Cc}^{(1)} \longrightarrow \sigma_{O5-H6}^* = 41.12, n_{O5}^{(2)} \longrightarrow \sigma_{O11-H12}^* = 35.38, n_{O11}^{(1)} \longrightarrow \sigma_{O17-H18}^* = 3.13$$

Figure 3: Orbital interactions defining the cluster stabilization for structure labeled as **24**,  $y_{24}$  in Figure 2 of the paper. All values in kcal/mol. This cluster constitutes a limit case between *O*-ylides and *O*-ylidic carbene-solvent complexes for the system studied in this work. However, it seems that its ylidic nature has the major contribution, because it exhibits a bonding orbital Cc–O.

- **41**,  $y_{34}$ , **43**,  $y_{35}$  and **44**,  $y_{36}$ : These structures have the same characteristic of the previous case:  $\sigma_{C_c-O}$ ,  $\Delta q(C_c) < 0$ ,  $\Delta q(O) > 0$ ,  $C_c \cdots O$  bond index  $< 0.5$ ,  $\nabla^2 \rho(r_c) > 0$ . Their  $|\mathcal{V}(r_c)|/\mathcal{G}(r_c)$  ratios are closer to 2 than to 1, their  $\mathcal{H}(r_c)/\rho(r_c)$  ratios are well separated (more negative values, stronger interactions) with respect to *O*-ylidic complexes and these three structures are the highest energy aggregates among the 48 minima. Such relative high energies may be a direct result of two factors: on the one hand, in the entire arrangement of these clusters there is a higher proportion of secondary hydrogen bonds (with small contributions to  $E(2)$ ) than primary hydrogen bonds and, on the other hand, the bonding due to this arrangement leads to larger  $C_c \cdots O$  distances, which are also important in ylidic stabilization.

### 3 Appendix A2

#### Complementary QTAIM properties to characterize $C_c \cdots O$ interactions

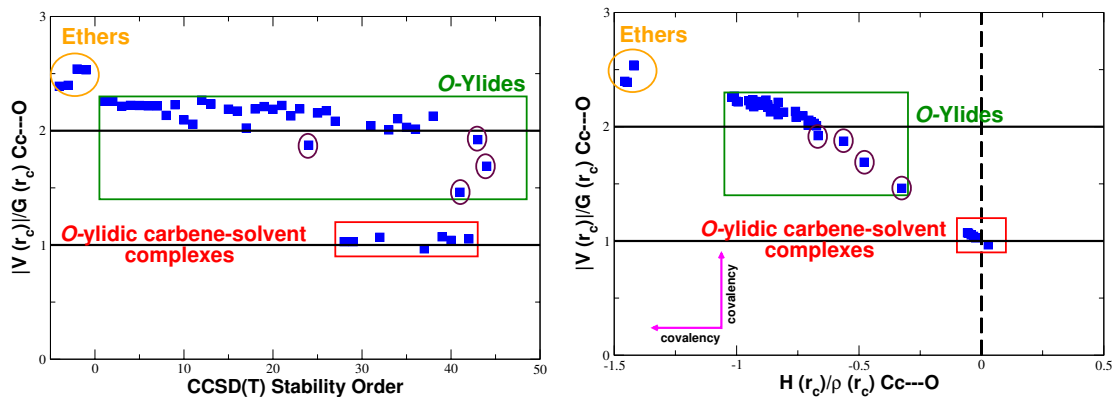

Figure 4: Quantification of the degree of covalency at carbene carbon-oxygen BCPs according to equation 1 in the paper. Boundaries for the considered criteria are shown as solid lines ( $|\mathcal{V}(r_c)|/\mathcal{G}(r_c) = 1, 2$  ratio values) and dashed line ( $\mathcal{H}(r_c)/\rho(r_c) = 0$ ). Maroon ellipses enclose structures at the borderline between *O*-ylidic and *O*-ylidic complexes.

From the right side of Figure 4 we notice that all  $Cc \cdots O$  intermolecular interactions have negative total energy densities, except only the hand constructed structure. In the case studied here, the sign and the magnitude of  $\mathcal{H}(\mathbf{r}_c)/\rho(\mathbf{r}_c)$  can be considered as good indicators of the strength of the interaction. Thus, ethers and most of the ylides should be classified to have  $Cc \cdots O$  strong interactions, while complexes are shown to be stabilized by weaker interactions, this seems to be consistent with the covalent character associated to the groups from  $|\mathcal{V}(\mathbf{r}_c)|/\mathcal{G}(\mathbf{r}_c)$  results.

## 4 Appendix A3

One of the four mechanisms proposed to describe the chemical transformations when carbenes react with molecules bearing the O–H bond

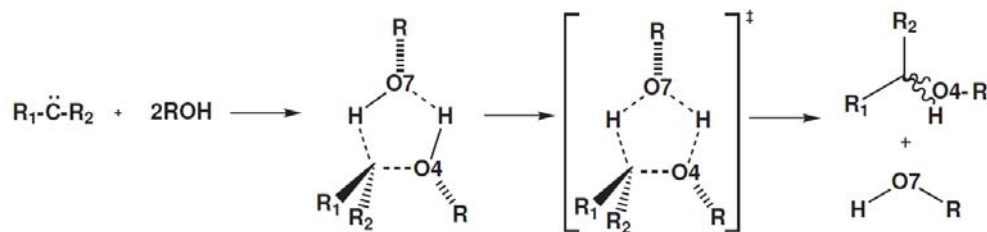

Figure 5: Reaction mechanism for the reaction of substituted singlet carbenes with two alcohol (or water) molecules. This mechanism was independently proposed by Pliego and co-workers, [see Ref. 68 in the paper] and by Marquez and co-workers, [see Ref. 69 in the paper] and features the catalytic action of one water (or alcohol) molecule, an intermediate involving a total of three molecules and a five-member ring early transition state for double proton transfer before alcohol (or ether) formation. It is the reaction channel that affords the highest rate constants [see Refs. 70,71 in the paper].

## 5 Appendix A4

Optimized geometries at the MP2/6-311++G(d,p) level

---

---

Insertion Products (Ethers)

---

---

|       |           |           |           |
|-------|-----------|-----------|-----------|
| $e_1$ |           |           |           |
| C     | 1.313067  | -0.352417 | 1.515476  |
| H     | 2.360672  | -0.264694 | 1.812101  |
| H     | 0.775019  | 0.581863  | 1.701585  |
| H     | 0.845847  | -1.167652 | 2.067849  |
| O     | 1.217665  | -0.696692 | 0.125453  |
| H     | -0.487981 | -1.236201 | -0.369194 |
| C     | -2.174252 | 2.403201  | -0.059956 |
| H     | -3.137466 | 2.184836  | 0.416703  |
| H     | -1.844873 | 3.390575  | 0.267704  |
| H     | -2.317661 | 2.427388  | -1.146949 |
| O     | -1.173651 | 1.472215  | 0.320686  |
| H     | 1.323588  | 1.281921  | -0.403873 |
| C     | -2.081638 | -2.346977 | -0.110313 |
| H     | -1.656984 | -3.240845 | -0.579010 |
| H     | -2.017176 | -2.448443 | 0.979291  |
| H     | -3.132317 | -2.271527 | -0.392264 |
| O     | -1.434899 | -1.165391 | -0.568319 |
| H     | -1.468486 | 0.595615  | 0.027072  |
| C     | 1.707969  | 0.302233  | -0.698492 |
| H     | 1.443655  | 0.036286  | -1.721748 |
| F     | 3.094486  | 0.357066  | -0.618013 |
| $e_2$ |           |           |           |
| C     | -1.933792 | -2.339784 | -0.216341 |
| H     | -1.856553 | -2.570022 | 0.852594  |
| H     | -2.987543 | -2.228392 | -0.473429 |
| H     | -1.518991 | -3.173518 | -0.793121 |
| O     | -1.289596 | -1.113282 | -0.539117 |
| H     | 2.248059  | -0.830860 | -1.537328 |
| C     | 1.355584  | -0.236408 | 1.556559  |
| H     | 2.376164  | -0.041879 | 1.904066  |
| H     | 0.776618  | 0.686789  | 1.501194  |
| H     | 0.866695  | -0.937633 | 2.231719  |
| O     | 1.399272  | -0.881708 | 0.270681  |
| H     | -0.349040 | -1.198557 | -0.322522 |
| C     | -1.586585 | 2.398995  | -0.214996 |



|       |           |           |           |
|-------|-----------|-----------|-----------|
| H     | -1.517901 | 3.354432  | 0.308577  |
| H     | -0.764542 | 2.336746  | -0.937584 |
| H     | -2.539008 | 2.372763  | -0.758668 |
| O     | -1.507324 | 1.373826  | 0.762762  |
| H     | -1.574927 | 0.530008  | 0.290353  |
| C     | 2.193556  | -0.216097 | -0.639330 |
| H     | 3.181559  | 0.005105  | -0.220486 |
| F     | 1.629779  | 1.002678  | -0.990591 |
|       |           |           |           |
| $e_3$ |           |           |           |
| C     | 2.965026  | -1.166590 | -0.438964 |
| H     | 3.470116  | -1.132161 | 0.533905  |
| H     | 3.139331  | -2.147767 | -0.883980 |
| H     | 3.410529  | -0.407171 | -1.093175 |
| O     | 1.562885  | -0.997684 | -0.311590 |
| H     | -0.717569 | -1.092573 | -1.177494 |
| C     | 0.601892  | 2.632728  | 0.280518  |
| H     | -0.033126 | 3.308014  | 0.863244  |
| H     | 1.615242  | 3.035618  | 0.261866  |
| H     | 0.218933  | 2.574134  | -0.743313 |
| O     | 0.673063  | 1.343690  | 0.884840  |
| H     | 1.411542  | -0.125033 | 0.090699  |
| C     | -1.330378 | -1.566508 | 1.266506  |
| H     | -2.178375 | -2.246325 | 1.120211  |
| H     | -0.399572 | -2.041492 | 0.941136  |
| H     | -1.262650 | -1.300347 | 2.320535  |
| O     | -1.540853 | -0.345084 | 0.554646  |
| H     | -0.218137 | 0.961097  | 0.874249  |
| C     | -1.618854 | -0.583913 | -0.822730 |
| H     | -2.536256 | -1.132234 | -1.068390 |
| F     | -1.687431 | 0.649396  | -1.419404 |
|       |           |           |           |
| $e_4$ |           |           |           |
| C     | -1.316137 | 0.103931  | 1.778345  |
| H     | -2.266097 | -0.236367 | 2.207828  |
| H     | -0.535380 | -0.646425 | 1.937708  |
| H     | -1.028718 | 1.043076  | 2.250103  |
| O     | -1.470403 | 0.380576  | 0.384754  |
| H     | 0.073269  | 1.173683  | -0.347803 |
| C     | 1.343754  | 2.650460  | -0.173814 |
| H     | 0.777356  | 3.361305  | -0.784634 |
| H     | 1.156338  | 2.860350  | 0.885962  |
| H     | 2.406802  | 2.788542  | -0.374134 |
| O     | 1.020238  | 1.307613  | -0.510872 |
| H     | 1.463924  | -0.334873 | 0.177676  |

|   |           |           |           |
|---|-----------|-----------|-----------|
| C | 2.386656  | -2.008281 | -0.163742 |
| H | 3.398722  | -1.647335 | 0.055432  |
| H | 2.304951  | -3.037170 | 0.191099  |
| H | 2.238479  | -2.000222 | -1.250275 |
| O | 1.396726  | -1.245432 | 0.508652  |
| H | -1.041418 | -1.543828 | -0.198226 |
| C | -1.822601 | -0.785263 | -0.307068 |
| H | -2.803709 | -1.145690 | 0.026022  |
| F | -1.918560 | -0.438021 | -1.626595 |

---



---

O-Ylides

---



---

**1,  $y_1$**

|   |           |           |           |
|---|-----------|-----------|-----------|
| C | 3.061896  | -0.960750 | 0.531687  |
| H | 3.813225  | -0.194901 | 0.725164  |
| H | 2.691411  | -1.348550 | 1.486139  |
| H | 3.523780  | -1.774591 | -0.034430 |
| O | 2.017306  | -0.347697 | -0.222128 |
| H | 1.323826  | -1.009548 | -0.385460 |
| C | 0.366952  | 2.650224  | -0.398670 |
| H | -0.562763 | 3.216569  | -0.336864 |
| H | 1.181946  | 3.258812  | 0.001017  |
| H | 0.572189  | 2.403797  | -1.444500 |
| O | 0.200892  | 1.465295  | 0.386593  |
| H | 0.991107  | 0.889522  | 0.253350  |
| C | -2.519160 | -0.361229 | 1.066137  |
| H | -3.410061 | -0.885365 | 0.729459  |
| H | -1.878434 | -1.031417 | 1.640339  |
| H | -2.770646 | 0.530701  | 1.641117  |
| O | -1.832936 | 0.069962  | -0.125828 |
| H | -1.010471 | 0.638817  | 0.107456  |
| C | -1.509156 | -1.110995 | -1.077283 |
| H | -1.020533 | -0.511532 | -1.868129 |
| F | -0.325541 | -1.665145 | -0.394998 |

**2,  $y_2$**

|   |           |           |           |
|---|-----------|-----------|-----------|
| C | -3.118063 | -0.676261 | -0.276539 |
| H | -3.798765 | 0.114410  | -0.592416 |
| H | -2.767980 | -1.221841 | -1.158753 |
| H | -3.654564 | -1.363315 | 0.383891  |
| O | -2.035654 | -0.051441 | 0.413089  |
| H | -1.403452 | -0.739077 | 0.682572  |

|   |           |           |           |
|---|-----------|-----------|-----------|
| C | 2.756889  | -0.173138 | 0.272735  |
| H | 3.427195  | -1.012312 | 0.104156  |
| H | 3.231827  | 0.774641  | 0.014970  |
| H | 2.404488  | -0.172575 | 1.305242  |
| O | 1.646840  | -0.362882 | -0.625629 |
| H | 0.980120  | 0.412747  | -0.559382 |
| C | 0.056736  | 2.634449  | 0.280054  |
| H | 0.984913  | 3.123741  | -0.017870 |
| H | -0.773970 | 3.325352  | 0.115968  |
| H | 0.106059  | 2.373328  | 1.341969  |
| O | -0.097057 | 1.469723  | -0.534165 |
| H | -0.922709 | 1.006729  | -0.254588 |
| C | 0.988095  | -1.755917 | -0.451587 |
| H | 0.210463  | -1.628360 | -1.228549 |
| F | 0.195711  | -1.512385 | 0.765384  |

**3,  $y_3$**

|   |           |           |           |
|---|-----------|-----------|-----------|
| C | -0.200635 | 2.335803  | 0.418281  |
| H | 0.668917  | 2.994255  | 0.440375  |
| H | -1.101281 | 2.948555  | 0.327322  |
| H | -0.239834 | 1.745564  | 1.339000  |
| O | -0.065294 | 1.481212  | -0.723671 |
| H | -0.879398 | 0.921094  | -0.759027 |
| C | 2.823182  | 0.173835  | 0.208799  |
| H | 3.554831  | -0.633040 | 0.219849  |
| H | 3.176542  | 0.996010  | -0.413779 |
| H | 2.617145  | 0.515320  | 1.227373  |
| O | 1.618140  | -0.342832 | -0.381104 |
| H | 0.977727  | 0.444990  | -0.553141 |
| C | -2.844614 | -0.331316 | 0.558646  |
| H | -3.519006 | -1.192640 | 0.549494  |
| H | -2.218315 | -0.368269 | 1.455262  |
| H | -3.443069 | 0.580831  | 0.562641  |
| O | -2.040972 | -0.304367 | -0.623231 |
| H | -1.451444 | -1.073222 | -0.574198 |
| C | 0.809104  | -1.233410 | 0.685630  |
| H | 1.646341  | -1.910941 | 0.936448  |
| F | 0.065959  | -2.034454 | -0.240190 |

**4,  $y_4$**

|   |           |           |           |
|---|-----------|-----------|-----------|
| C | -2.634441 | 0.192634  | -0.754589 |
| H | -3.504609 | -0.257287 | -0.277820 |
| H | -2.878685 | 1.179695  | -1.148793 |
| H | -2.250823 | -0.461648 | -1.536568 |
| O | -1.640939 | 0.373184  | 0.282323  |

|   |           |           |           |
|---|-----------|-----------|-----------|
| H | -0.805456 | 0.853275  | -0.076040 |
| C | 2.216308  | -1.489479 | 0.219374  |
| H | 1.460621  | -1.230799 | 0.960683  |
| H | 1.847197  | -2.336858 | -0.361592 |
| H | 3.164238  | -1.740631 | 0.703390  |
| O | 2.382511  | -0.325997 | -0.618479 |
| H | 2.895638  | -0.577206 | -1.390336 |
| C | 0.922974  | 2.328297  | 0.604686  |
| H | 0.217650  | 3.150651  | 0.727309  |
| H | 0.972977  | 1.748092  | 1.530238  |
| H | 1.907864  | 2.732599  | 0.360522  |
| O | 0.444057  | 1.513058  | -0.474717 |
| H | 1.121408  | 0.816576  | -0.621814 |
| C | -1.096129 | -0.873041 | 1.037227  |
| H | -2.055032 | -1.229775 | 1.454998  |
| F | -0.892255 | -1.786567 | -0.053043 |

**5,  $y_5$**

|   |           |           |           |
|---|-----------|-----------|-----------|
| C | -0.146078 | 2.655645  | 0.618470  |
| H | 0.772115  | 3.230427  | 0.494609  |
| H | -1.002527 | 3.319182  | 0.474126  |
| H | -0.177295 | 2.234349  | 1.627897  |
| O | -0.145088 | 1.624143  | -0.372672 |
| H | -0.938536 | 1.054612  | -0.232156 |
| C | 2.775404  | -0.221824 | -0.833198 |
| H | 3.164450  | -1.232749 | -0.922319 |
| H | 2.754016  | 0.283621  | -1.800224 |
| H | 3.367522  | 0.340374  | -0.109197 |
| O | 1.416203  | -0.344663 | -0.381974 |
| H | 0.903736  | 0.536500  | -0.394990 |
| C | -2.977568 | -0.759032 | -0.683542 |
| H | -3.638527 | 0.071637  | -0.932336 |
| H | -2.569836 | -1.181964 | -1.607178 |
| H | -3.554903 | -1.525274 | -0.158442 |
| O | -1.943418 | -0.241826 | 0.152570  |
| H | -1.337163 | -0.970863 | 0.371452  |
| C | 1.289764  | -1.134823 | 0.979499  |
| H | 0.822706  | -0.328007 | 1.581404  |
| F | 0.129282  | -1.930320 | 0.659621  |

**6,  $y_6$**

|   |          |           |           |
|---|----------|-----------|-----------|
| C | 3.507475 | -0.689090 | -0.172835 |
| H | 2.830080 | -1.026846 | -0.953253 |
| H | 4.485881 | -0.455932 | -0.598265 |
| H | 3.598322 | -1.472535 | 0.582949  |

|   |           |           |           |
|---|-----------|-----------|-----------|
| O | 2.916341  | 0.499371  | 0.389084  |
| H | 3.451069  | 0.788364  | 1.134112  |
| C | -4.029827 | -0.484269 | 0.250751  |
| H | -4.957037 | 0.070826  | 0.086934  |
| H | -4.107195 | -1.440698 | -0.284542 |
| H | -3.947186 | -0.698993 | 1.325362  |
| O | -2.956814 | 0.302887  | -0.218044 |
| H | -2.113877 | -0.179520 | 0.006373  |
| C | -0.121869 | 1.633183  | -0.552086 |
| H | -1.188803 | 1.776690  | -0.400345 |
| H | 0.435912  | 2.560844  | -0.423145 |
| H | 0.072630  | 1.186207  | -1.527237 |
| O | 0.324246  | 0.723875  | 0.491697  |
| H | 1.319432  | 0.630644  | 0.453394  |
| C | -0.356639 | -0.678396 | 0.407329  |
| H | 0.085417  | -1.101857 | 1.324062  |
| F | 0.418926  | -1.281648 | -0.625250 |

**7,  $y_7$**

|   |           |           |           |
|---|-----------|-----------|-----------|
| C | 2.988223  | -0.650049 | 0.536216  |
| H | 3.594878  | 0.169266  | 0.922648  |
| H | 2.525640  | -1.181443 | 1.374022  |
| H | 3.633171  | -1.338531 | -0.016791 |
| O | 2.002407  | -0.077267 | -0.323672 |
| H | 1.439531  | -0.798807 | -0.652368 |
| C | -2.931990 | -0.185314 | 0.347203  |
| H | -3.477597 | -1.045820 | -0.030804 |
| H | -2.940841 | -0.186763 | 1.438902  |
| H | -3.341582 | 0.748572  | -0.041801 |
| O | -1.586774 | -0.306560 | -0.146071 |
| H | -1.017399 | 0.503376  | 0.095355  |
| C | 0.066887  | 2.750048  | -0.373516 |
| H | -0.852555 | 3.295958  | -0.159519 |
| H | 0.920794  | 3.369982  | -0.089080 |
| H | 0.118353  | 2.530056  | -1.444506 |
| O | 0.044385  | 1.548232  | 0.401363  |
| H | 0.872538  | 1.045428  | 0.210988  |
| C | -0.928331 | -1.677834 | 0.309601  |
| H | -0.250594 | -1.270997 | 1.090416  |
| F | -0.008135 | -1.841846 | -0.785272 |

**8,  $y_8$**

|   |           |          |          |
|---|-----------|----------|----------|
| C | 0.620073  | 2.197520 | 0.747974 |
| H | -0.224809 | 2.854373 | 0.956211 |
| H | 0.767639  | 1.521919 | 1.594388 |

|   |           |           |           |
|---|-----------|-----------|-----------|
| H | 1.513299  | 2.807597  | 0.589493  |
| O | 0.304455  | 1.462988  | -0.441237 |
| H | 1.064924  | 0.872270  | -0.629971 |
| C | 2.261014  | -1.487778 | -0.147107 |
| H | 1.197128  | -1.707841 | -0.044916 |
| H | 2.754785  | -2.284158 | -0.710851 |
| H | 2.714745  | -1.395482 | 0.843827  |
| O | 2.346059  | -0.240948 | -0.868111 |
| H | 3.272521  | -0.008395 | -0.969080 |
| C | -2.381072 | -0.193665 | -1.365706 |
| H | -3.288583 | -0.766659 | -1.177180 |
| H | -2.628906 | 0.759505  | -1.833162 |
| H | -1.692245 | -0.774416 | -1.983033 |
| O | -1.774584 | 0.082332  | -0.092258 |
| H | -0.939507 | 0.646591  | -0.257771 |
| C | -1.159027 | -1.295629 | 0.532213  |
| H | -2.128478 | -1.690165 | 0.893371  |
| F | -0.603987 | -0.732534 | 1.704141  |

**9,  $y_9$**

|   |           |           |           |
|---|-----------|-----------|-----------|
| C | -0.184249 | 2.094110  | 0.763436  |
| H | 0.708125  | 2.719582  | 0.810124  |
| H | -1.067740 | 2.729591  | 0.858055  |
| H | -0.162157 | 1.361013  | 1.574339  |
| O | -0.180462 | 1.440178  | -0.512280 |
| H | -1.044498 | 0.988351  | -0.599813 |
| C | -2.664676 | -1.095867 | 0.109175  |
| H | -1.842410 | -1.150341 | 0.820108  |
| H | -3.617015 | -1.210346 | 0.633632  |
| H | -2.547655 | -1.893142 | -0.629378 |
| O | -2.584315 | 0.199760  | -0.511137 |
| H | -3.240279 | 0.243553  | -1.211711 |
| C | 2.876420  | 0.097367  | -0.182862 |
| H | 3.583482  | -0.708901 | -0.360322 |
| H | 3.177456  | 1.011546  | -0.697340 |
| H | 2.761379  | 0.265720  | 0.889259  |
| O | 1.624043  | -0.331023 | -0.749063 |
| H | 0.925199  | 0.408265  | -0.663948 |
| C | 1.113976  | -1.661742 | -0.087658 |
| H | 0.237223  | -1.790652 | -0.752188 |
| F | 0.489548  | -1.116529 | 1.099608  |

**10,  $y_{10}$**

|   |           |          |          |
|---|-----------|----------|----------|
| C | 0.329121  | 1.737989 | 1.282209 |
| H | -0.616296 | 2.190381 | 1.577476 |

|   |           |           |           |
|---|-----------|-----------|-----------|
| H | 0.468289  | 0.817110  | 1.852865  |
| H | 1.144914  | 2.440087  | 1.475698  |
| O | 0.246622  | 1.459841  | -0.124960 |
| H | 1.112383  | 1.102713  | -0.403180 |
| C | 2.732201  | -1.075727 | -0.251641 |
| H | 1.730975  | -1.432306 | -0.017140 |
| H | 3.198049  | -1.746456 | -0.978429 |
| H | 3.328570  | -1.049377 | 0.664776  |
| O | 2.576858  | 0.241402  | -0.805965 |
| H | 3.447733  | 0.609255  | -0.975274 |
| C | -2.757625 | 0.379936  | -0.983349 |
| H | -3.458973 | -0.392139 | -1.298658 |
| H | -3.144948 | 0.905009  | -0.106524 |
| H | -2.563977 | 1.070161  | -1.804588 |
| O | -1.523416 | -0.272188 | -0.645652 |
| H | -0.825696 | 0.444353  | -0.461179 |
| C | -1.668355 | -0.999662 | 0.821112  |
| H | -2.343300 | -1.803714 | 0.464554  |
| F | -0.410032 | -1.649193 | 0.823581  |

**11**,  $y_{11}$

|   |           |           |           |
|---|-----------|-----------|-----------|
| C | -1.463185 | 2.166767  | -0.699458 |
| H | -0.811281 | 3.040601  | -0.723104 |
| H | -1.374177 | 1.621626  | -1.643884 |
| H | -2.496333 | 2.497432  | -0.564024 |
| O | -1.048366 | 1.355392  | 0.403771  |
| H | -1.591065 | 0.539481  | 0.386965  |
| C | -1.735209 | -2.138120 | -0.078998 |
| H | -0.757441 | -1.830828 | -0.455930 |
| H | -1.606203 | -2.715388 | 0.841620  |
| H | -2.254805 | -2.745281 | -0.825382 |
| O | -2.471653 | -0.925261 | 0.179739  |
| H | -3.295853 | -1.153391 | 0.616786  |
| C | 1.727406  | 0.056014  | 1.561590  |
| H | 2.780624  | -0.211737 | 1.534435  |
| H | 1.533153  | 0.774073  | 2.359139  |
| H | 1.117156  | -0.844003 | 1.672845  |
| O | 1.414414  | 0.690341  | 0.307553  |
| H | 0.445863  | 0.980881  | 0.357995  |
| C | 1.366459  | -0.428741 | -0.909098 |
| H | 1.328510  | 0.336674  | -1.710576 |
| F | 2.717097  | -0.798826 | -0.913290 |

**12**,  $y_{12}$

|   |           |          |           |
|---|-----------|----------|-----------|
| C | -0.116657 | 1.764250 | -0.528031 |
|---|-----------|----------|-----------|

|   |           |           |           |
|---|-----------|-----------|-----------|
| H | -1.109208 | 1.808632  | -0.085203 |
| H | 0.282560  | 2.760795  | -0.712975 |
| H | -0.140641 | 1.167610  | -1.438764 |
| O | 0.757024  | 1.140879  | 0.456378  |
| H | 1.695800  | 0.942409  | 0.125350  |
| C | 3.311383  | -0.988361 | -0.680092 |
| H | 3.916688  | -0.472072 | -1.426443 |
| H | 3.911882  | -1.780230 | -0.223337 |
| H | 2.438125  | -1.436510 | -1.166705 |
| O | 2.920941  | -0.029714 | 0.303324  |
| H | 2.230223  | -0.458984 | 0.895281  |
| C | -3.988604 | -0.699570 | -0.028183 |
| H | -4.857490 | -0.042496 | -0.079168 |
| H | -4.126842 | -1.514436 | -0.748080 |
| H | -3.931145 | -1.123898 | 0.980864  |
| O | -2.848874 | 0.090100  | -0.336326 |
| H | -2.074817 | -0.482370 | -0.285630 |
| C | 0.387026  | -0.219953 | 1.093893  |
| H | -0.477686 | 0.086717  | 1.698309  |
| F | -0.216563 | -0.911499 | -0.007336 |

**13**,  $y_{13}$

|   |           |           |           |
|---|-----------|-----------|-----------|
| C | 2.900961  | -0.065073 | 0.535374  |
| H | 3.200679  | -1.106260 | 0.640408  |
| H | 3.387549  | 0.394849  | -0.327503 |
| H | 3.125778  | 0.490048  | 1.446600  |
| O | 1.468222  | -0.059243 | 0.356983  |
| H | 1.062725  | 0.882206  | 0.262855  |
| C | -1.001885 | 2.418695  | 0.025674  |
| H | -0.720561 | 3.284440  | 0.625975  |
| H | -1.636859 | 2.751351  | -0.800030 |
| H | -1.537169 | 1.692797  | 0.642130  |
| O | 0.209896  | 1.849248  | -0.489314 |
| H | 0.008559  | 1.019386  | -1.008036 |
| C | -2.775791 | -0.869869 | -0.137322 |
| H | -3.622526 | -0.203566 | 0.038984  |
| H | -2.306650 | -0.606507 | -1.092673 |
| H | -3.152361 | -1.897164 | -0.203086 |
| O | -1.877704 | -0.703603 | 0.951193  |
| H | -1.107404 | -1.242541 | 0.740080  |
| C | 0.850571  | -0.745785 | -0.913821 |
| H | 1.769008  | -1.073078 | -1.428175 |
| F | 0.364754  | -1.944998 | -0.349761 |

**14**,  $y_{14}$



|   |           |           |           |
|---|-----------|-----------|-----------|
| C | -3.338250 | -0.564972 | 0.876800  |
| H | -3.682844 | -0.047818 | 1.773339  |
| H | -4.207057 | -0.926254 | 0.319105  |
| H | -2.720480 | -1.420978 | 1.170697  |
| O | -2.595537 | 0.364871  | 0.090011  |
| H | -2.122444 | -0.138144 | -0.660413 |
| C | 0.397870  | 1.917571  | -0.322543 |
| H | 1.432593  | 1.742127  | -0.609519 |
| H | -0.179037 | 2.363136  | -1.136073 |
| H | 0.339701  | 2.539882  | 0.570667  |
| O | -0.157141 | 0.621117  | 0.016916  |
| H | -1.124403 | 0.704504  | 0.340212  |
| C | 2.930827  | -0.272963 | 1.226035  |
| H | 3.724750  | 0.419234  | 1.510969  |
| H | 1.994285  | 0.047779  | 1.698435  |
| H | 3.189270  | -1.269815 | 1.600579  |
| O | 2.841648  | -0.246115 | -0.191377 |
| H | 2.142792  | -0.864860 | -0.432832 |
| C | -0.416500 | -0.368012 | -1.197808 |
| H | 0.234960  | 0.095766  | -1.954173 |
| F | 0.313609  | -1.492588 | -0.778922 |

**15**,  $y_{15}$

|   |           |           |           |
|---|-----------|-----------|-----------|
| C | 2.494256  | -1.371704 | 0.524963  |
| H | 1.479956  | -1.662467 | 0.254900  |
| H | 3.177834  | -2.188895 | 0.280365  |
| H | 2.531298  | -1.162827 | 1.597592  |
| O | 2.803389  | -0.200485 | -0.246589 |
| H | 3.693484  | 0.084050  | -0.023854 |
| C | 0.315782  | 2.304611  | -0.011150 |
| H | -0.740072 | 2.565184  | -0.048540 |
| H | 0.588952  | 2.113266  | 1.030005  |
| H | 0.914708  | 3.126688  | -0.412049 |
| O | 0.492819  | 1.129135  | -0.814129 |
| H | 1.399267  | 0.796500  | -0.675880 |
| C | -2.096504 | -1.009753 | -1.297299 |
| H | -2.597836 | -1.939173 | -1.038833 |
| H | -2.788898 | -0.171425 | -1.210242 |
| H | -1.657349 | -1.055127 | -2.294942 |
| O | -1.020962 | -0.856259 | -0.351331 |
| H | -0.476212 | -0.024363 | -0.563451 |
| C | -1.558370 | -0.808287 | 1.141155  |
| H | -0.558247 | -0.720239 | 1.612925  |
| F | -2.011093 | 0.552277  | 1.182488  |

**16,  $y_{16}$** 

|   |           |           |           |
|---|-----------|-----------|-----------|
| C | 3.104477  | -0.904266 | 0.452428  |
| H | 3.814417  | -0.077663 | 0.436144  |
| H | 2.646099  | -0.966880 | 1.444051  |
| H | 3.639526  | -1.833461 | 0.237277  |
| O | 2.128533  | -0.628031 | -0.556165 |
| H | 1.476268  | -1.336955 | -0.537030 |
| C | -2.280697 | -0.968445 | -1.116298 |
| H | -2.598586 | -1.982936 | -0.889225 |
| H | -3.004541 | -0.250975 | -0.728135 |
| H | -2.120710 | -0.827750 | -2.186116 |
| O | -1.012413 | -0.786774 | -0.454611 |
| H | -0.630301 | 0.137532  | -0.647570 |
| C | 0.215525  | 2.427153  | 0.069461  |
| H | -0.787038 | 2.849075  | 0.021341  |
| H | 0.393723  | 2.061790  | 1.083857  |
| H | 0.947150  | 3.195846  | -0.191977 |
| O | 0.266911  | 1.354530  | -0.882061 |
| H | 1.124090  | 0.898589  | -0.796418 |
| C | -1.136256 | -1.013150 | 1.118538  |
| H | -0.060935 | -0.838526 | 1.332493  |
| F | -1.702412 | 0.245196  | 1.491026  |

**17,  $y_{17}$** 

|   |           |           |           |
|---|-----------|-----------|-----------|
| C | -1.519095 | -0.953941 | 1.252243  |
| H | -2.571301 | -0.817065 | 1.488222  |
| H | -1.192937 | -1.956526 | 1.533587  |
| H | -0.922124 | -0.182302 | 1.744830  |
| O | -1.381813 | -0.822809 | -0.174977 |
| H | -0.407243 | -0.964535 | -0.382788 |
| C | 1.891878  | -2.206626 | -0.185700 |
| H | 1.339187  | -3.105193 | -0.462698 |
| H | 2.869274  | -2.233326 | -0.676441 |
| H | 2.031712  | -2.189660 | 0.900362  |
| O | 1.133937  | -1.084013 | -0.631139 |
| H | 1.597371  | -0.268085 | -0.349644 |
| C | 1.535216  | 2.371225  | 0.185931  |
| H | 0.490740  | 2.061423  | 0.113651  |
| H | 1.682262  | 3.010598  | 1.060774  |
| H | 1.814876  | 2.914062  | -0.721529 |
| O | 2.312996  | 1.162021  | 0.316932  |
| H | 3.243143  | 1.396064  | 0.265763  |
| C | -1.606100 | 0.762700  | -0.619871 |
| H | -1.635780 | 0.528635  | -1.702105 |
| F | -2.963504 | 0.880463  | -0.299348 |

**18**,  $y_{18}$ 

|   |           |           |           |
|---|-----------|-----------|-----------|
| C | -3.321404 | -0.629187 | -0.783426 |
| H | -3.141959 | -0.159835 | -1.749506 |
| H | -2.738682 | -1.549450 | -0.709873 |
| H | -4.388062 | -0.835542 | -0.676071 |
| O | -2.894993 | 0.321697  | 0.213665  |
| H | -3.069884 | -0.065641 | 1.077496  |
| C | 0.191314  | 1.982443  | 0.001607  |
| H | 1.246023  | 1.914886  | -0.256892 |
| H | -0.350878 | 2.627999  | -0.689044 |
| H | 0.064151  | 2.324778  | 1.031620  |
| O | -0.351740 | 0.647817  | -0.145371 |
| H | -1.341662 | 0.637549  | 0.002122  |
| C | 3.712673  | -0.716073 | -0.495717 |
| H | 4.590331  | -0.306001 | -1.001707 |
| H | 4.061712  | -1.353262 | 0.328213  |
| H | 3.168791  | -1.348519 | -1.210694 |
| O | 2.926220  | 0.363395  | -0.036360 |
| H | 2.104973  | -0.022706 | 0.372605  |
| C | 0.331331  | -0.382101 | 0.864622  |
| H | -0.227684 | -0.111602 | 1.784677  |
| F | -0.321838 | -1.549602 | 0.435452  |

**19**,  $y_{19}$ 

|   |           |           |           |
|---|-----------|-----------|-----------|
| C | 0.179952  | 1.933144  | -0.021472 |
| H | 1.267689  | 1.918760  | -0.049410 |
| H | -0.229642 | 2.644588  | -0.737997 |
| H | -0.181060 | 2.144849  | 0.988259  |
| O | -0.254553 | 0.614952  | -0.435167 |
| H | -1.250397 | 0.544369  | -0.490411 |
| C | -3.753616 | -0.067064 | 0.412340  |
| H | -4.056824 | 0.978713  | 0.441908  |
| H | -4.609386 | -0.677513 | 0.114787  |
| H | -3.406585 | -0.374605 | 1.402918  |
| O | -2.703826 | -0.165489 | -0.558519 |
| H | -2.400208 | -1.082110 | -0.590831 |
| C | 3.873627  | -0.561217 | -0.166684 |
| H | 4.805574  | -0.045660 | -0.411223 |
| H | 4.095315  | -1.324631 | 0.591190  |
| H | 3.515095  | -1.070093 | -1.071702 |
| O | 2.951058  | 0.400574  | 0.302479  |
| H | 2.092635  | -0.070050 | 0.471814  |
| C | 0.262269  | -0.520892 | 0.551316  |
| H | -0.462436 | -0.372334 | 1.377723  |

|                      |           |           |           |
|----------------------|-----------|-----------|-----------|
| F                    | -0.277178 | -1.635379 | -0.128931 |
| <b>20</b> , $y_{20}$ |           |           |           |
| C                    | -0.223434 | 1.421849  | 1.262887  |
| H                    | -1.167615 | 1.814347  | 0.891018  |
| H                    | -0.320084 | 1.123328  | 2.306340  |
| H                    | 0.588049  | 2.133532  | 1.120325  |
| O                    | 0.038838  | 0.212628  | 0.496359  |
| H                    | 0.874535  | -0.293807 | 0.774894  |
| C                    | -3.654889 | -0.918838 | -0.486147 |
| H                    | -4.646662 | -0.470981 | -0.418514 |
| H                    | -3.275348 | -0.778097 | -1.504653 |
| H                    | -3.742170 | -1.992090 | -0.283612 |
| O                    | -2.838833 | -0.262744 | 0.477305  |
| H                    | -1.956450 | -0.638823 | 0.409032  |
| C                    | 3.366156  | -0.932016 | 0.129101  |
| H                    | 3.825012  | -1.043246 | 1.112436  |
| H                    | 3.863629  | -1.607591 | -0.572501 |
| H                    | 3.490973  | 0.099852  | -0.216444 |
| O                    | 1.984740  | -1.272506 | 0.252508  |
| H                    | 1.522180  | -1.022453 | -0.605556 |
| C                    | 0.294250  | 0.305927  | -1.064465 |
| H                    | -0.713289 | 0.618072  | -1.377827 |
| F                    | 1.054087  | 1.486377  | -1.165840 |
| <b>21</b> , $y_{21}$ |           |           |           |
| C                    | 1.191516  | 2.148690  | -0.011349 |
| H                    | 0.252655  | 1.899680  | -0.502191 |
| H                    | 1.024522  | 2.204978  | 1.065673  |
| H                    | 1.566133  | 3.100514  | -0.394471 |
| O                    | 2.122877  | 1.091858  | -0.330650 |
| H                    | 2.958887  | 1.282298  | 0.104936  |
| C                    | 0.375559  | -1.479290 | -1.432877 |
| H                    | 0.011330  | -2.502614 | -1.417966 |
| H                    | -0.453980 | -0.771541 | -1.413783 |
| H                    | 1.031271  | -1.302476 | -2.286506 |
| O                    | 1.181115  | -1.327229 | -0.238222 |
| H                    | 1.562145  | -0.399040 | -0.214678 |
| C                    | -3.249579 | 0.331430  | -0.182069 |
| H                    | -3.779930 | 0.790822  | -1.017629 |
| H                    | -3.320001 | -0.758591 | -0.275904 |
| H                    | -3.739404 | 0.635979  | 0.749924  |
| O                    | -1.902600 | 0.778989  | -0.239820 |
| H                    | -1.426913 | 0.355178  | 0.487645  |
| C                    | 0.395857  | -1.676520 | 1.083453  |

|   |           |           |          |
|---|-----------|-----------|----------|
| H | 1.283827  | -1.771811 | 1.731528 |
| F | -0.051311 | -0.339799 | 1.456667 |

**22**,  $y_{22}$

|   |           |           |           |
|---|-----------|-----------|-----------|
| C | -1.531236 | -0.484341 | -1.464891 |
| H | -1.027257 | 0.366938  | -1.912771 |
| H | -0.801931 | -1.196153 | -1.079022 |
| H | -2.241346 | -0.937909 | -2.155770 |
| O | -2.319548 | 0.073178  | -0.356677 |
| H | -2.846659 | -0.639640 | 0.042527  |
| C | 1.964415  | -1.886161 | 0.547172  |
| H | 1.954067  | -2.978055 | 0.559654  |
| H | 2.999305  | -1.553156 | 0.697309  |
| H | 1.351052  | -1.521639 | 1.380289  |
| O | 1.451083  | -1.466411 | -0.706363 |
| H | 1.445506  | -0.491350 | -0.687864 |
| C | 1.801229  | 2.269143  | 0.046934  |
| H | 2.726657  | 2.341121  | -0.528322 |
| H | 1.290077  | 3.238389  | -0.000025 |
| H | 2.057358  | 2.059627  | 1.093381  |
| O | 1.010313  | 1.237980  | -0.518968 |
| H | 0.148733  | 1.184722  | -0.004407 |
| C | -1.418291 | 0.725833  | 0.793716  |
| H | -2.234900 | 1.257216  | 1.304431  |
| F | -1.205794 | -0.403881 | 1.601007  |

**23**,  $y_{23}$

|   |           |           |           |
|---|-----------|-----------|-----------|
| C | 1.915496  | -0.264853 | 1.314023  |
| H | 2.931845  | -0.440710 | 0.965942  |
| H | 1.923813  | 0.191177  | 2.304653  |
| H | 1.330358  | -1.182206 | 1.307605  |
| O | 1.341391  | 0.709218  | 0.400523  |
| H | 0.384579  | 0.905453  | 0.600733  |
| C | -2.119660 | -1.824850 | -0.049715 |
| H | -2.744569 | -2.131036 | 0.791230  |
| H | -2.404383 | -0.808179 | -0.344096 |
| H | -2.310564 | -2.505607 | -0.887717 |
| O | -0.770787 | -1.886419 | 0.384512  |
| H | -0.216955 | -1.625769 | -0.362327 |
| C | -1.511684 | 2.230779  | -0.485281 |
| H | -0.876974 | 1.889837  | -1.302248 |
| H | -2.566860 | 2.068984  | -0.720522 |
| H | -1.327178 | 3.292302  | -0.299609 |
| O | -1.132098 | 1.434948  | 0.656277  |
| H | -1.577740 | 1.773109  | 1.437513  |

|   |          |           |           |
|---|----------|-----------|-----------|
| C | 1.449387 | 0.524081  | -1.153828 |
| H | 2.550307 | 0.566638  | -1.222166 |
| F | 1.221672 | -0.894101 | -1.283408 |

**24**,  $y_{24}$

|   |           |           |           |
|---|-----------|-----------|-----------|
| C | -3.572059 | -0.760887 | -0.697782 |
| H | -3.977890 | -1.644838 | -0.204636 |
| H | -4.383193 | -0.047265 | -0.870129 |
| H | -3.144279 | -1.055827 | -1.662560 |
| O | -2.584314 | -0.198637 | 0.161444  |
| H | -2.110024 | 0.548317  | -0.312320 |
| C | 0.185904  | 0.124779  | 1.773583  |
| H | 1.198771  | 0.516010  | 1.786719  |
| H | -0.533342 | 0.890904  | 2.067011  |
| H | 0.109503  | -0.755408 | 2.411145  |
| O | -0.095388 | -0.306772 | 0.413471  |
| H | -1.056540 | -0.606598 | 0.406942  |
| C | 3.244638  | -0.352461 | -0.825879 |
| H | 4.316736  | -0.350464 | -0.625939 |
| H | 3.088093  | -0.648613 | -1.869963 |
| H | 2.860205  | 0.663902  | -0.683187 |
| O | 2.655855  | -1.275808 | 0.082413  |
| H | 1.703869  | -1.228021 | -0.048241 |
| C | -0.330895 | 0.989136  | -0.685238 |
| H | 0.254863  | 0.519601  | -1.494093 |
| F | 0.522054  | 1.938293  | -0.171941 |

**25**,  $y_{25}$

|   |           |           |           |
|---|-----------|-----------|-----------|
| C | 3.019444  | -1.078933 | 0.408715  |
| H | 3.870307  | -0.413443 | 0.559540  |
| H | 2.558358  | -1.286990 | 1.380904  |
| H | 3.385259  | -2.018769 | -0.019406 |
| O | 2.120981  | -0.410823 | -0.469864 |
| H | 1.351000  | -0.978265 | -0.576550 |
| C | 0.669579  | 2.490589  | -0.141801 |
| H | 1.275115  | 2.259602  | -1.015027 |
| H | 0.468190  | 3.563528  | -0.097256 |
| H | 1.205349  | 2.163859  | 0.751532  |
| O | -0.564364 | 1.766824  | -0.292903 |
| H | -1.082001 | 1.845962  | 0.518851  |
| C | -1.815892 | -1.145313 | -1.363143 |
| H | -1.927763 | -2.220632 | -1.251615 |
| H | -2.735848 | -0.637857 | -1.071004 |
| H | -1.519725 | -0.873605 | -2.377061 |
| O | -0.744804 | -0.758315 | -0.473685 |

|   |           |           |           |
|---|-----------|-----------|-----------|
| H | -0.606473 | 0.247294  | -0.511065 |
| C | -1.081473 | -1.150216 | 1.045087  |
| H | -0.111255 | -0.806395 | 1.454391  |
| F | -1.930551 | -0.035839 | 1.383582  |

**26**,  $y_{26}$

|   |           |           |           |
|---|-----------|-----------|-----------|
| C | 2.569543  | -0.567314 | 0.706137  |
| H | 2.535092  | -1.623326 | 0.967593  |
| H | 3.337062  | -0.382618 | -0.049019 |
| H | 2.744028  | 0.039930  | 1.595680  |
| O | 1.267725  | -0.233050 | 0.182211  |
| H | 1.138733  | 0.752292  | 0.019574  |
| C | -2.826985 | -0.539798 | -0.097989 |
| H | -3.562666 | 0.249338  | 0.073482  |
| H | -2.344304 | -0.381604 | -1.068761 |
| H | -3.352656 | -1.501656 | -0.117914 |
| O | -1.885141 | -0.475025 | 0.964949  |
| H | -1.188739 | -1.098359 | 0.727951  |
| C | -0.641297 | 2.414820  | -0.132328 |
| H | -1.010948 | 1.781861  | 0.672186  |
| H | -0.881209 | 3.462827  | 0.059305  |
| H | -1.082744 | 2.078545  | -1.072113 |
| O | 0.796095  | 2.243283  | -0.164407 |
| H | 1.120429  | 2.637950  | -0.979652 |
| C | 0.688271  | -0.982010 | -1.075127 |
| H | 1.623227  | -1.440510 | -1.450706 |
| F | 0.084230  | -2.090058 | -0.404865 |

**27**,  $y_{27}$

|   |           |           |           |
|---|-----------|-----------|-----------|
| C | 2.936233  | -0.432318 | -1.185235 |
| H | 3.658958  | -1.250085 | -1.167031 |
| H | 1.960900  | -0.828183 | -1.494229 |
| H | 3.265823  | 0.303831  | -1.927690 |
| O | 2.890025  | 0.116479  | 0.122143  |
| H | 2.246710  | 0.835630  | 0.092348  |
| C | -3.415503 | 0.455749  | -0.457553 |
| H | -2.945347 | 1.042762  | 0.329249  |
| H | -3.388014 | 1.020522  | -1.392550 |
| H | -4.446208 | 0.203189  | -0.197711 |
| O | -2.626298 | -0.749907 | -0.568361 |
| H | -2.896797 | -1.223932 | -1.359424 |
| C | 0.200369  | -1.502464 | 1.107822  |
| H | 1.257320  | -1.365504 | 1.327291  |
| H | -0.405912 | -1.468870 | 2.016185  |
| H | 0.033480  | -2.440512 | 0.575862  |

|   |           |           |           |
|---|-----------|-----------|-----------|
| O | -0.174900 | -0.417985 | 0.229073  |
| H | -1.095342 | -0.576422 | -0.113920 |
| C | -0.294485 | 1.044019  | 0.945783  |
| H | 0.378319  | 0.814358  | 1.793759  |
| F | 0.567312  | 1.772735  | 0.087791  |

**31**,  $y_{28}$

|   |           |           |           |
|---|-----------|-----------|-----------|
| C | -0.023827 | -0.217068 | 1.671567  |
| H | 1.007515  | 0.062322  | 1.867053  |
| H | -0.717866 | 0.504008  | 2.107548  |
| H | -0.213237 | -1.230091 | 2.027323  |
| O | -0.195500 | -0.216706 | 0.233298  |
| H | -1.092042 | -0.602055 | 0.045499  |
| C | -3.540584 | 0.071597  | -0.461273 |
| H | -3.034402 | 0.974206  | -0.119831 |
| H | -3.710020 | 0.141124  | -1.538571 |
| H | -4.490982 | -0.054353 | 0.062310  |
| O | -2.653693 | -1.022860 | -0.151430 |
| H | -2.979687 | -1.821707 | -0.574398 |
| C | 2.941820  | -1.107310 | -0.862345 |
| H | 3.553579  | -1.979327 | -0.625231 |
| H | 1.909735  | -1.436843 | -1.031913 |
| H | 3.325608  | -0.657048 | -1.785800 |
| O | 3.034316  | -0.218686 | 0.239655  |
| H | 2.480689  | 0.541266  | 0.027895  |
| C | -0.362527 | 1.327272  | -0.344487 |
| H | -0.371055 | 1.004118  | -1.406317 |
| F | 0.973543  | 1.752606  | -0.183170 |

**33**,  $y_{29}$

|   |           |           |           |
|---|-----------|-----------|-----------|
| C | -0.280664 | 1.837969  | 0.478246  |
| H | -1.357974 | 1.813252  | 0.625332  |
| H | 0.250330  | 1.975653  | 1.423538  |
| H | -0.008123 | 2.613753  | -0.237801 |
| O | 0.084382  | 0.558906  | -0.084920 |
| H | 1.029307  | 0.613414  | -0.387451 |
| C | 3.312660  | -0.452702 | -0.033773 |
| H | 2.817953  | -0.541338 | 0.931806  |
| H | 3.219000  | -1.400874 | -0.567891 |
| H | 4.364989  | -0.185796 | 0.090268  |
| O | 2.616716  | 0.600563  | -0.736947 |
| H | 2.928931  | 0.616798  | -1.645836 |
| C | -2.885711 | -0.740042 | -0.768521 |
| H | -1.938243 | -0.554271 | -1.270279 |
| H | -2.755716 | -1.599863 | -0.104327 |



|   |           |           |           |
|---|-----------|-----------|-----------|
| H | -3.653274 | -0.966339 | -1.516934 |
| O | -3.200336 | 0.449825  | -0.040387 |
| H | -4.009341 | 0.278241  | 0.447508  |
| C | 0.182806  | -0.573577 | 1.132370  |
| H | -0.889882 | -0.503868 | 1.397008  |
| F | 0.224601  | -1.718111 | 0.318128  |

**34**,  $y_{30}$

|   |           |           |           |
|---|-----------|-----------|-----------|
| C | 1.238079  | 2.353896  | -0.125658 |
| H | 0.617025  | 1.988989  | -0.943595 |
| H | 0.788511  | 3.257651  | 0.294883  |
| H | 2.251744  | 2.568186  | -0.475251 |
| O | 1.263025  | 1.288650  | 0.846188  |
| H | 1.670050  | 1.618614  | 1.651536  |
| C | -1.401623 | -1.093000 | 1.381290  |
| H | -2.456165 | -1.275718 | 1.182496  |
| H | -0.779090 | -1.928484 | 1.063341  |
| H | -1.252638 | -0.869263 | 2.439746  |
| O | -1.054149 | 0.083857  | 0.618222  |
| H | -0.127941 | 0.397957  | 0.779812  |
| C | 1.931556  | -1.223780 | -1.061448 |
| H | 1.148798  | -0.556381 | -1.422028 |
| H | 2.825902  | -0.634076 | -0.834031 |
| H | 2.164479  | -1.956353 | -1.842088 |
| O | 1.415679  | -1.859220 | 0.112959  |
| H | 2.087424  | -2.471125 | 0.423250  |
| C | -1.267887 | 0.087595  | -0.972384 |
| H | -1.310925 | -1.011138 | -1.118326 |
| F | -2.624929 | 0.446287  | -1.016610 |

**35**,  $y_{31}$

|   |           |           |           |
|---|-----------|-----------|-----------|
| C | 3.338436  | -0.602517 | 0.938975  |
| H | 2.271335  | -0.800793 | 1.039089  |
| H | 3.851215  | -1.540500 | 0.699973  |
| H | 3.723266  | -0.213458 | 1.888391  |
| O | 3.479196  | 0.352946  | -0.115604 |
| H | 4.415284  | 0.542789  | -0.210181 |
| C | -2.992917 | -0.346847 | 1.119429  |
| H | -2.012530 | -0.644510 | 1.487621  |
| H | -3.652860 | -0.080443 | 1.948581  |
| H | -3.412011 | -1.173062 | 0.542482  |
| O | -2.771645 | 0.805358  | 0.277364  |
| H | -3.581377 | 0.983527  | -0.208836 |
| C | 0.397879  | 1.592284  | -0.249459 |
| H | 1.430062  | 1.360664  | -0.505558 |

|   |           |           |           |
|---|-----------|-----------|-----------|
| H | 0.107953  | 2.566726  | -0.643879 |
| H | 0.263664  | 1.547045  | 0.832972  |
| O | -0.436221 | 0.596234  | -0.882109 |
| H | -1.356344 | 0.706036  | -0.521267 |
| C | -0.014842 | -0.909806 | -0.316042 |
| H | 0.829050  | -1.034841 | -1.021302 |
| F | -1.046521 | -1.628240 | -0.946968 |

**36**,  $y_{32}$

|   |           |           |           |
|---|-----------|-----------|-----------|
| C | -2.162935 | 1.750922  | -0.021909 |
| H | -2.330415 | 0.853480  | -0.615469 |
| H | -2.902591 | 1.795177  | 0.781262  |
| H | -2.243352 | 2.636875  | -0.655836 |
| O | -0.829751 | 1.638825  | 0.515872  |
| H | -0.680224 | 2.363500  | 1.130745  |
| C | 2.782208  | 0.443384  | -0.885454 |
| H | 3.743388  | 0.212812  | -0.424071 |
| H | 2.314508  | -0.488277 | -1.221241 |
| H | 2.960885  | 1.090880  | -1.750936 |
| O | 1.997293  | 1.099355  | 0.109657  |
| H | 1.146329  | 1.314304  | -0.285181 |
| C | 0.626914  | -1.612167 | 1.478975  |
| H | 0.560623  | -2.671255 | 1.245794  |
| H | 1.603581  | -1.215062 | 1.205822  |
| H | 0.412772  | -1.423992 | 2.532594  |
| O | -0.406812 | -0.976702 | 0.700808  |
| H | -0.409825 | 0.000711  | 0.825892  |
| C | -0.347508 | -1.400873 | -0.890129 |
| H | -0.109772 | -0.383379 | -1.273539 |
| F | -1.727091 | -1.473910 | -1.132826 |

**38**,  $y_{33}$

|   |           |           |           |
|---|-----------|-----------|-----------|
| C | 2.279608  | -0.632498 | 0.982817  |
| H | 1.280084  | -0.463990 | 1.378910  |
| H | 2.453089  | -1.712571 | 0.933005  |
| H | 3.017361  | -0.177495 | 1.652419  |
| O | 2.316132  | -0.036141 | -0.318777 |
| H | 3.206444  | -0.153921 | -0.659547 |
| C | 0.064167  | 2.433591  | -0.004587 |
| H | 1.074527  | 2.045813  | -0.117614 |
| H | 0.046603  | 3.502015  | -0.232200 |
| H | -0.287157 | 2.252750  | 1.014079  |
| O | -0.746060 | 1.709898  | -0.953748 |
| H | -1.658367 | 1.992222  | -0.833022 |
| C | -0.410332 | -1.753481 | -1.410482 |

|   |           |           |           |
|---|-----------|-----------|-----------|
| H | -0.373622 | -2.733779 | -0.940824 |
| H | -1.265380 | -1.698591 | -2.089662 |
| H | 0.518688  | -1.523417 | -1.931810 |
| O | -0.548699 | -0.803861 | -0.344648 |
| H | -0.566491 | 0.133239  | -0.690769 |
| C | -1.831761 | -1.102286 | 0.589457  |
| H | -2.580614 | -0.528992 | -0.005482 |
| F | -1.516250 | -0.173823 | 1.612963  |

**41**,  $y_{34}$

|   |           |           |           |
|---|-----------|-----------|-----------|
| C | 0.655813  | 2.236683  | -0.828055 |
| H | -0.136908 | 1.495488  | -0.905316 |
| H | 0.266431  | 3.109362  | -0.297229 |
| H | 0.982994  | 2.524729  | -1.831972 |
| O | 1.721226  | 1.621596  | -0.091755 |
| H | 2.446158  | 2.249053  | -0.034631 |
| C | -1.420239 | -1.775411 | -0.966916 |
| H | -0.332473 | -1.765712 | -0.925100 |
| H | -1.831105 | -2.456341 | -0.217787 |
| H | -1.765061 | -2.041207 | -1.967422 |
| O | -1.840269 | -0.421151 | -0.667675 |
| H | -2.802744 | -0.392537 | -0.730251 |
| C | 2.198235  | -1.689776 | 0.864534  |
| H | 2.053536  | -2.771202 | 0.830589  |
| H | 3.263373  | -1.491245 | 1.034006  |
| H | 1.626223  | -1.288098 | 1.709603  |
| O | 1.753099  | -1.161689 | -0.375607 |
| H | 1.846889  | -0.198623 | -0.318870 |
| C | -1.655683 | -0.126094 | 1.163924  |
| H | -0.553735 | -0.198646 | 1.055574  |
| F | -1.867198 | 1.226947  | 1.142020  |

**43**,  $y_{35}$

|   |           |           |           |
|---|-----------|-----------|-----------|
| C | -2.496632 | -1.602615 | 0.290417  |
| H | -1.625055 | -1.432511 | 0.920519  |
| H | -3.335738 | -1.933171 | 0.909900  |
| H | -2.250434 | -2.378351 | -0.440862 |
| O | -2.797566 | -0.356489 | -0.353380 |
| H | -3.540630 | -0.498387 | -0.944997 |
| C | 2.372922  | 0.894454  | -0.511470 |
| H | 1.524616  | 1.188557  | -1.125184 |
| H | 2.918559  | 1.769324  | -0.155656 |
| H | 3.031127  | 0.198604  | -1.030598 |
| O | 1.773818  | 0.235367  | 0.643687  |
| H | 2.443361  | 0.043391  | 1.312945  |

|   |           |           |           |
|---|-----------|-----------|-----------|
| C | -0.864817 | 2.208717  | 0.574999  |
| H | -0.028830 | 2.907394  | 0.655420  |
| H | -1.797949 | 2.779098  | 0.653788  |
| H | -0.807162 | 1.502274  | 1.411004  |
| O | -0.750693 | 1.551264  | -0.677848 |
| H | -1.462866 | 0.894921  | -0.701093 |
| C | 1.036488  | -1.240298 | 0.421125  |
| H | 0.384514  | -0.872471 | -0.391549 |
| F | 2.050472  | -1.907929 | -0.291525 |

**44**,  $y_{36}$

|   |           |           |           |
|---|-----------|-----------|-----------|
| C | 0.173566  | -1.120386 | -1.619803 |
| H | -0.259803 | -0.142815 | -1.431419 |
| H | 0.672621  | -1.150054 | -2.589785 |
| H | -0.594266 | -1.891346 | -1.546127 |
| O | 1.171683  | -1.314317 | -0.582439 |
| H | 1.634984  | -2.145926 | -0.738553 |
| C | 1.824869  | 2.048598  | -0.544423 |
| H | 1.519925  | 2.764201  | -1.309745 |
| H | 2.560517  | 2.532186  | 0.108273  |
| H | 2.297154  | 1.187338  | -1.031492 |
| O | 0.653959  | 1.671565  | 0.166033  |
| H | 0.924807  | 1.021534  | 0.825688  |
| C | -2.689721 | 0.946873  | 0.417304  |
| H | -1.718437 | 1.416463  | 0.266689  |
| H | -3.472702 | 1.615850  | 0.043795  |
| H | -2.839329 | 0.781734  | 1.489938  |
| O | -2.667734 | -0.287716 | -0.304847 |
| H | -3.519056 | -0.711174 | -0.171244 |
| C | 0.522049  | -1.654049 | 1.015664  |
| H | -0.434197 | -1.145104 | 0.793330  |
| F | 1.219993  | -0.668372 | 1.716469  |

---

O-ylidic carbene-solvent complexes

---

**28**,  $c_1$

|   |           |          |           |
|---|-----------|----------|-----------|
| C | 0.381517  | 2.567960 | -0.515472 |
| H | 1.359466  | 3.042475 | -0.428381 |
| H | -0.235275 | 3.163565 | -1.196727 |
| H | -0.092213 | 2.541534 | 0.470857  |
| O | 0.595908  | 1.255187 | -1.027479 |
| H | -0.264866 | 0.814876 | -1.091806 |

|   |           |           |           |
|---|-----------|-----------|-----------|
| C | 3.077130  | -0.890050 | 0.561988  |
| H | 3.333556  | -1.821463 | 1.069518  |
| H | 3.621639  | -0.851641 | -0.389429 |
| H | 3.407878  | -0.053320 | 1.189705  |
| O | 1.672660  | -0.882169 | 0.367608  |
| H | 1.445681  | -0.054102 | -0.087967 |
| C | -1.128893 | -1.826947 | -1.242654 |
| H | -0.076631 | -1.879475 | -0.967304 |
| H | -1.688913 | -2.588961 | -0.694302 |
| H | -1.245164 | -1.974736 | -2.319183 |
| O | -1.578414 | -0.511388 | -0.860988 |
| H | -2.523460 | -0.460067 | -1.037471 |
| C | -1.777947 | -0.585172 | 1.434383  |
| H | -0.712621 | -0.896101 | 1.378625  |
| F | -1.684573 | 0.725513  | 1.649030  |

**29**,  $c_2$

|   |           |           |           |
|---|-----------|-----------|-----------|
| C | -3.081161 | -0.882836 | 0.567412  |
| H | -3.338232 | -1.813054 | 1.076809  |
| H | -3.410096 | -0.044617 | 1.194116  |
| H | -3.626737 | -0.845306 | -0.383441 |
| O | -1.676917 | -0.877159 | 0.371403  |
| H | -1.449159 | -0.050554 | -0.086431 |
| C | -0.378222 | 2.566994  | -0.516008 |
| H | -1.354962 | 3.044204  | -0.429991 |
| H | 0.094232  | 2.539255  | 0.470904  |
| H | 0.241002  | 3.160940  | -1.196478 |
| O | -0.595652 | 1.254802  | -1.028265 |
| H | 0.264258  | 0.812942  | -1.093597 |
| C | 1.119700  | -1.831704 | -1.240012 |
| H | 0.068856  | -1.880869 | -0.958698 |
| H | 1.229351  | -1.981880 | -2.316920 |
| H | 1.680785  | -2.594076 | -0.693292 |
| O | 1.574986  | -0.516533 | -0.863663 |
| H | 2.519321  | -0.468622 | -1.044890 |
| C | 1.779950  | -0.586931 | 1.431396  |
| H | 0.711279  | -0.886678 | 1.378281  |
| F | 1.701019  | 0.725145  | 1.643456  |

**32**,  $c_4$

|   |          |           |           |
|---|----------|-----------|-----------|
| C | 1.443750 | -1.402932 | -1.167251 |
| H | 0.417489 | -1.565920 | -0.842044 |
| H | 1.513245 | -1.552246 | -2.247082 |
| H | 2.118668 | -2.080205 | -0.639390 |
| O | 1.769299 | -0.031883 | -0.835557 |

|   |           |           |           |
|---|-----------|-----------|-----------|
| H | 2.664154  | 0.136458  | -1.150106 |
| C | -2.577775 | -1.096152 | 0.663658  |
| H | -3.485413 | -0.482202 | 0.606614  |
| H | -2.872639 | -2.120215 | 0.898850  |
| H | -1.948041 | -0.721856 | 1.480820  |
| O | -1.879984 | -1.126935 | -0.570143 |
| H | -1.620999 | -0.213712 | -0.768927 |
| C | -0.733903 | 2.394770  | 0.020157  |
| H | -1.755620 | 2.775872  | 0.036395  |
| H | -0.492063 | 1.991702  | 1.010092  |
| H | -0.057444 | 3.226254  | -0.206112 |
| O | -0.675951 | 1.387627  | -0.984087 |
| H | 0.232528  | 1.054222  | -1.013788 |
| C | 2.123148  | 0.035219  | 1.369370  |
| H | 2.017415  | 1.138571  | 1.240475  |
| F | 0.892277  | -0.333626 | 1.710766  |

**37**,  $c_5$

|   |           |           |           |
|---|-----------|-----------|-----------|
| C | 0.000812  | -0.976520 | 0.008298  |
| H | 0.001147  | -1.816971 | -0.705136 |
| F | 0.000793  | -1.556838 | 1.205261  |
| C | 2.962755  | 0.114583  | -0.411024 |
| H | 2.338911  | 0.738443  | -1.048023 |
| H | 3.974316  | 0.061672  | -0.825406 |
| H | 2.997820  | 0.562111  | 0.587528  |
| O | 2.353414  | -1.180928 | -0.378999 |
| H | 2.865026  | -1.729322 | 0.222735  |
| C | -2.962692 | 0.112448  | -0.410521 |
| H | -2.338700 | 0.738091  | -1.045629 |
| H | -3.973644 | 0.059048  | -0.826325 |
| H | -2.999627 | 0.558284  | 0.588727  |
| O | -2.351914 | -1.182431 | -0.379788 |
| H | -2.863286 | -1.732170 | 0.220916  |
| C | -0.001708 | 2.569475  | 0.721686  |
| H | 0.887970  | 2.327450  | 1.319925  |
| H | -0.003059 | 3.645818  | 0.536312  |
| H | -0.890455 | 2.325295  | 1.320432  |
| O | -0.001276 | 1.913686  | -0.529573 |
| H | -0.000351 | 0.951250  | -0.337153 |

**39**,  $c_6$

|   |          |           |           |
|---|----------|-----------|-----------|
| C | 2.187331 | -1.235027 | -0.993273 |
| H | 3.271434 | -1.351975 | -1.045935 |
| H | 1.728708 | -2.009718 | -1.620632 |
| H | 1.917390 | -0.251388 | -1.395088 |

|   |           |           |           |
|---|-----------|-----------|-----------|
| O | 1.814542  | -1.365844 | 0.369379  |
| H | 0.853666  | -1.272230 | 0.398509  |
| C | 1.740748  | 2.015343  | 0.493866  |
| H | 2.281345  | 1.131725  | 0.831332  |
| H | 2.323871  | 2.517517  | -0.285987 |
| H | 1.609420  | 2.700469  | 1.338985  |
| O | 0.487060  | 1.547969  | -0.005167 |
| H | -0.016156 | 2.311798  | -0.299559 |
| C | -1.428744 | -0.496544 | 1.688169  |
| H | -0.773483 | 0.370037  | 1.731558  |
| H | -2.471419 | -0.169334 | 1.655246  |
| H | -1.263170 | -1.139450 | 2.556499  |
| O | -1.076268 | -1.190593 | 0.478834  |
| H | -1.636333 | -1.970754 | 0.403583  |
| C | -1.865023 | -0.328321 | -1.393353 |
| H | -0.798624 | -0.117770 | -1.613828 |
| F | -2.292800 | 0.842901  | -0.907946 |

**40**, *c*<sub>7</sub>

|   |           |           |           |
|---|-----------|-----------|-----------|
| C | -2.480741 | -1.297895 | -0.125321 |
| H | -3.406252 | -1.158468 | -0.686710 |
| H | -2.538446 | -2.263188 | 0.393100  |
| H | -2.397508 | -0.496049 | 0.617626  |
| O | -1.412475 | -1.262724 | -1.062088 |
| H | -0.599509 | -1.421908 | -0.565655 |
| C | -1.068654 | 2.129461  | -0.405090 |
| H | -1.130916 | 1.201157  | -0.971829 |
| H | -1.937409 | 2.751039  | -0.647197 |
| H | -0.152412 | 2.660306  | -0.682848 |
| O | -1.060277 | 1.763261  | 0.978864  |
| H | -1.051849 | 2.577446  | 1.488009  |
| C | 1.061633  | -0.791897 | 1.644541  |
| H | 0.373346  | 0.049122  | 1.579937  |
| H | 0.716205  | -1.502065 | 2.400657  |
| H | 2.060924  | -0.429909 | 1.900599  |
| O | 1.068024  | -1.409618 | 0.343818  |
| H | 1.708139  | -2.128678 | 0.354626  |
| C | 2.266765  | -0.212055 | -1.176129 |
| H | 1.327966  | -0.251509 | -1.771177 |
| F | 2.176836  | 0.968852  | -0.569100 |

**42**, *c*<sub>8</sub>

|   |           |           |          |
|---|-----------|-----------|----------|
| C | -1.621542 | -0.491547 | 1.769082 |
| H | -1.788501 | 0.548396  | 1.494261 |
| H | -2.532322 | -1.070978 | 1.599247 |

|   |           |           |           |
|---|-----------|-----------|-----------|
| H | -1.324318 | -0.547756 | 2.819128  |
| O | -0.561622 | -0.975127 | 0.921167  |
| H | -0.354086 | -1.872316 | 1.206031  |
| C | 0.480860  | 2.262471  | 0.020205  |
| H | 0.756434  | 3.276482  | 0.312790  |
| H | 0.774810  | 1.579190  | 0.827179  |
| H | 1.032202  | 1.996861  | -0.888451 |
| O | -0.923845 | 2.259234  | -0.187089 |
| H | -1.152277 | 1.427861  | -0.611209 |
| C | 3.196673  | -0.382002 | 0.088078  |
| H | 3.999965  | -0.837443 | -0.491879 |
| H | 3.226111  | 0.702409  | -0.071419 |
| H | 3.375836  | -0.588670 | 1.149989  |
| O | 1.979223  | -0.952604 | -0.367988 |
| H | 1.262712  | -0.574382 | 0.153535  |
| C | -1.392878 | -1.622934 | -1.079635 |
| H | -0.322221 | -1.751590 | -1.348552 |
| F | -1.653675 | -0.392891 | -1.540640 |

---



---

Hydrogen bonded carbene-solvent complex

---



---

|                   |           |           |           |
|-------------------|-----------|-----------|-----------|
| <b>30</b> , $c_3$ |           |           |           |
| C                 | -2.921171 | 0.711830  | 0.689473  |
| H                 | -3.800935 | 0.099735  | 0.485549  |
| H                 | -2.535656 | 0.452015  | 1.682285  |
| H                 | -3.220189 | 1.765706  | 0.690330  |
| O                 | -1.969003 | 0.443851  | -0.331638 |
| H                 | -1.162231 | 0.951923  | -0.123562 |
| C                 | 0.854672  | 2.739966  | -0.604023 |
| H                 | 0.048249  | 3.451069  | -0.786031 |
| H                 | 1.702144  | 3.276251  | -0.164607 |
| H                 | 1.160297  | 2.303763  | -1.561274 |
| O                 | 0.352825  | 1.749039  | 0.288162  |
| H                 | 1.060856  | 1.095941  | 0.438362  |
| C                 | -0.253796 | -2.369781 | 0.025389  |
| H                 | -0.046948 | -3.433838 | 0.162577  |
| H                 | 0.605952  | -1.926185 | -0.505285 |
| H                 | -0.329090 | -1.901546 | 1.017289  |
| O                 | -1.444577 | -2.249127 | -0.713106 |
| H                 | -1.682678 | -1.305661 | -0.688703 |
| C                 | 2.344481  | -0.477020 | 0.686699  |
| H                 | 2.304746  | -1.345477 | 1.381482  |
| F                 | 3.359601  | -0.740419 | -0.084554 |

---
